# Supplementary material for: Barriers and enablers to utilisation of the WHO surgical safety checklist at the university teaching hospital in Lusaka, Zambia: a qualitative study
Source: Springer Nature journal article supplement (doi:10.1186/s12913-022-08257-y), 2022-07-09
Supplement: MOESM1 [file 23253486]

## Consolidated criteria for reporting qualitative studies (COREQ): 32-item checklist

| No                                             | Item                                     | Guide questions/description                                                                                                                                     | Manuscript Pg.                                                                     |
|------------------------------------------------|------------------------------------------|-----------------------------------------------------------------------------------------------------------------------------------------------------------------|------------------------------------------------------------------------------------|
| <b>Domain 1: Research team and reflexivity</b> |                                          |                                                                                                                                                                 |                                                                                    |
| Personal Characteristics                       |                                          |                                                                                                                                                                 |                                                                                    |
| 1                                              | Interviewer/facilitator                  | Which author/s conducted the interview or focus group?                                                                                                          | 6                                                                                  |
| 2                                              | Credentials                              | What were the researcher's credentials? <i>E.g. PhD, MD</i>                                                                                                     | 6                                                                                  |
| 3                                              | Occupation                               | What was their occupation at the time of the study?                                                                                                             | 6                                                                                  |
| 4                                              | Gender                                   | Was the researcher male or female?                                                                                                                              | 6                                                                                  |
| 5                                              | Experience and training                  | What experience or training did the researcher have?                                                                                                            | 6                                                                                  |
| Relationship with participants                 |                                          |                                                                                                                                                                 |                                                                                    |
| 6                                              | Relationship established                 | Was a relationship established prior to study commencement?                                                                                                     | 6                                                                                  |
| 7                                              | Participant knowledge of the interviewer | What did the participants know about the researcher? <i>e.g. personal goals, reasons for doing the research</i>                                                 | 6, this was explained before the interview as part of the informed consent process |
| 8                                              | Interviewer characteristics              | What characteristics were reported about the interviewer/facilitator? <i>e.g. Bias, assumptions, reasons and interests in the research topic</i>                | 6-7                                                                                |
| <b>Domain 2: study design</b>                  |                                          |                                                                                                                                                                 |                                                                                    |
| Theoretical framework                          |                                          |                                                                                                                                                                 |                                                                                    |
| 9                                              | Methodological orientation and Theory    | What methodological orientation was stated to underpin the study? <i>e.g. grounded theory, discourse analysis, ethnography, phenomenology, content analysis</i> | 5-7                                                                                |
| Participant selection                          |                                          |                                                                                                                                                                 |                                                                                    |
| 10                                             | Sampling                                 | How were participants selected? <i>e.g. purposive, convenience, consecutive, snowball</i>                                                                       | 6                                                                                  |
| 11                                             | Method of approach                       | How were participants approached? <i>e.g. face-to-face, telephone, mail, email</i>                                                                              | 6-7                                                                                |
| 12                                             | Sample size                              | How many participants were in the study?                                                                                                                        | 6                                                                                  |
| 13                                             | Non-participation                        | How many people refused to participate or dropped out? Reasons?                                                                                                 | NA, none of the contacted participants                                             |

|                                        |                                |                                                                                          |                                                                                                                                                                      |
|----------------------------------------|--------------------------------|------------------------------------------------------------------------------------------|----------------------------------------------------------------------------------------------------------------------------------------------------------------------|
|                                        |                                |                                                                                          | refused to take part in the study                                                                                                                                    |
| <b>Setting</b>                         |                                |                                                                                          |                                                                                                                                                                      |
| 14                                     | Setting of data collection     | Where was the data collected? <i>e.g. home, clinic, workplace</i>                        | 6-7                                                                                                                                                                  |
| 15                                     | Presence of non-participants   | Was anyone else present besides the participants and researchers?                        | 6-7                                                                                                                                                                  |
| 15                                     | Description of sample          | What are the important characteristics of the sample? <i>e.g. demographic data, date</i> | data not collected to maintain anonymity of respondents because the teams from which participants were selected were relatively small. Only their cadre was recorded |
| <b>Data collection</b>                 |                                |                                                                                          |                                                                                                                                                                      |
| 17                                     | Interview guide                | Were questions, prompts, guides provided by the authors? Was it pilot tested?            | 6                                                                                                                                                                    |
| 18                                     | Repeat interviews              | Were repeat interviews carried out? If yes, how many?                                    | NA                                                                                                                                                                   |
| 19                                     | Audio/visual recording         | Did the research use audio or visual recording to collect the data?                      | 7                                                                                                                                                                    |
| 20                                     | Field notes                    | Were field notes made during and/or after the interview or focus group?                  | NA                                                                                                                                                                   |
| 21                                     | Duration                       | What was the duration of the interviews or focus group?                                  | 7                                                                                                                                                                    |
| 22                                     | Data saturation                | Was data saturation discussed?                                                           | 6-7                                                                                                                                                                  |
| 23                                     | Transcripts returned           | Were transcripts returned to participants for comment and/or correction?                 | NA, not requested                                                                                                                                                    |
| <b>Domain 3: analysis and findings</b> |                                |                                                                                          |                                                                                                                                                                      |
| <b>Data analysis</b>                   |                                |                                                                                          |                                                                                                                                                                      |
| 24                                     | Number of data coders          | How many data coders coded the data?                                                     | 7                                                                                                                                                                    |
| 25                                     | Description of the coding tree | Did authors provide a description of the coding tree?                                    | 8, figure 1                                                                                                                                                          |
| 26                                     | Derivation of themes           | Were themes identified in advance or derived from the data?                              | 7-8                                                                                                                                                                  |
| 27                                     | Software                       | What software, if applicable, was used to manage the data?                               | 7                                                                                                                                                                    |

|           |                              |                                                                                                                                          |                                                                                                                           |
|-----------|------------------------------|------------------------------------------------------------------------------------------------------------------------------------------|---------------------------------------------------------------------------------------------------------------------------|
| 28        | Participant checking         | Did participants provide feedback on the findings?                                                                                       | yes, the first author briefed participants on findings at a follow up informal meeting, but no major comments were raised |
| Reporting |                              |                                                                                                                                          |                                                                                                                           |
| 29        | Quotations presented         | Were participant quotations presented to illustrate the themes / findings? Was each quotation identified? <i>e.g. participant number</i> | 9-17                                                                                                                      |
| 30        | Data and findings consistent | Was there consistency between the data presented and the findings?                                                                       | 9-17                                                                                                                      |
| 31        | Clarity of major themes      | Were major themes clearly presented in the findings?                                                                                     | 9-17                                                                                                                      |
| 32        | Clarity of minor themes      | Is there a description of diverse cases or discussion of minor themes?                                                                   | 9-17                                                                                                                      |

From: Tong A, Sainsbury P, Craig J. Consolidated criteria for reporting qualitative research (COREQ): a 32-item checklist for interviews and focus groups. *Int J Qual Health Care.* 2007;19(6):349-357.
